# Supplementary material for: Porous micro-spherical LiFePO4/CNT nanocomposite for high-performance Li-ion battery cathode material
Source: Royal Society of Chemistry journal article supplement (doi:10.1039/c5ra05988g), 2015-01-01
Supplement: c5ra05988g1.pdf [file c5ra05988g1.pdf]

## Supplementary Information

Wei Wei<sup>a,b</sup>, Linlin Guo<sup>a,b</sup>, Xiaoyang Qiu<sup>a</sup>, Peng Qu<sup>a\*</sup>, Maotian Xu<sup>a\*</sup> and Lin Guo<sup>b\*</sup>

<sup>a</sup>School of Chemistry and Chemical Engineering, Shangqiu Normal University, Wenhua road No. 298, Shangqiu, 476000, P. R. China.

<sup>b</sup>School of Chemistry and Environment, Beihang University, Beijing 100191, China.

As shown in Fig. S1, the cyclic voltammograms (CV) of LiFePO<sub>4</sub>/CNT electrode was tested at 0.1, 0.5 and 1.0 mV/s, respectively. For the diffusion-limited process, the peak current is proportional to the square roots of the scan rate ( $v^{-1/2}$ ) as the following Randles–Sevcik equation:<sup>1</sup>

$$I_p = (2.69 \times 10^5) n^{3/2} AD^{1/2} C v^{1/2} \quad (1)$$

Where  $n$  is the number of transfer electrons ( $n = 1$  for Fe<sup>2+</sup>/Fe<sup>3+</sup> redox pair);  $A$  is the surface of the electrode;  $D$  is the diffusion coefficient; and  $C$  is the concentration of reactants. The linear relations shows in Fig. S2 for the LiFePO<sub>4</sub>/CNT indicates a diffusion-limited reaction. In addition, the slope of the fitted line is dependent on the diffusion coefficient of Li ion, and  $D = 1.12 \times 10^{-10} \text{ cm}^2 \text{ s}^{-1}$  is obtained according to Eq. (1), which is 3 ~ 4 orders higher than bare LiFePO<sub>4</sub> electrode ( $10^{-13} \sim 10^{-14} \text{ cm}^2 \text{ s}^{-1}$ ).<sup>2</sup> Therefore, the prepared ionic conductivity LiFePO<sub>4</sub>/CNT electrode is greatly improved.

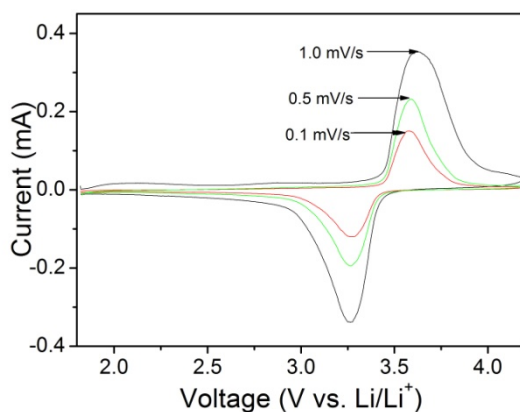

Fig. S1. CV curves of LiFePO<sub>4</sub>/CNT electrode at different scanning rates.

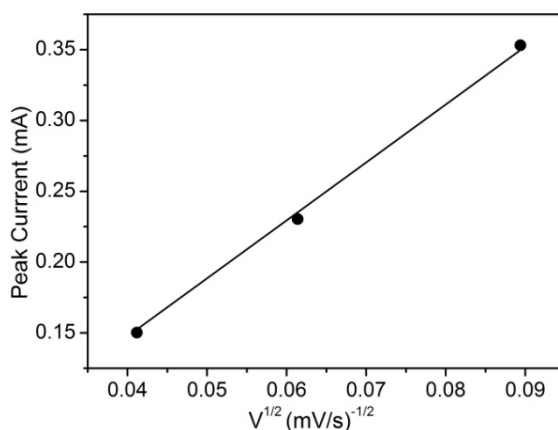

Fig. S2. The relation between peak current and the square roots of the scan rate.

### References

1. K. Tang, X. Yu, J. Sun, H. Li, X. Huang, *Electrochimica Acta*, **2011**, 56, 4869.
2. S. Franger, F. L. Cras, C. Bourbon and H. Rouault, *Electrochem. Solid-State Lett.*, **2002**, 5, A231.
